# Supplementary material for: Presentation of Chemotherapy Options in Cachexia in the Literature: A Scientometric Evaluation
Source: Research Square preprint supplement (doi:10.21203/rs.3.rs-906171/v1), 2021-10-21
Supplement: Supplementary file 1 [file 85094b540253fceb05a210f8.docx]

Table S1 The publications with the highest citation score in every eight groups.

| **Group** | **First Author** | **Title** | **Year** | **Citation Score** |
| --- | --- | --- | --- | --- |
| 1 | Lisa Martin | Cancer cachexia in the age of obesity: skeletal muscle depletion is a powerful prognostic factor, independent of body mass index | 2013 | 105 |
| Kenneth C Fearon | Definition of cancer cachexia: effect of weight loss, reduced food intake, and systemic inflammation on functional status and prognosis | 2006 | 66 |
| Kenneth C Fearon | Effect of a protein and energy dense n-3 fatty acid enriched oral supplement on loss of weight and lean tissue in cancer cachexia: a randomised double blind trial | 2003 | 46 |
| 2 | Christopher Deans | Systemic inflammation, cachexia and prognosis in patients with cancer | 2005 | 22 |
| 3 | J. Feliu | Usefulness of megestrol-acetate in cancer cachexia and anorexia - a placebo-controlled study | 1992 | 14 |
| 4 | Jochen Springer | Prevention of liver cancer cachexia-induced cardiac wasting and heart failure | 2014 | 13 |
| 5 | Maurizio Bossola | Cancer cachexia: it's time for more clinical trials | 2007 | 9 |
| 6 | Antonio Vigano | quality of life and survival prediction in terminal cancer patients - a multicenter study | 2004 | 4 |
| 7 | L C Nebeling | Effects of a ketogenic diet on tumor metabolism and nutritional-status in pediatric oncology patients - 2 case-reports | 1995 | 4 |
| 8 | I Gioulbasanis | Baseline nutritional evaluation in metastatic lung cancer patients: mini nutritional assessment versus weight loss history | 2011 | 7 |
